# Supplementary material for: A novel tricyclic polyketide and its biosynthetic precursor azaphilone derivatives from the endophytic fungus Dothideomycete sp
Source: Royal Society of Chemistry journal article supplement (doi:10.1039/c2ob25959a), 2012-01-01

## Supplementary Information

### **A novel tricyclic polyketide and its biosynthetic precursor azaphilone derivatives from the endophytic fungus *Dothideomycete* sp.**

Sarath P. D. Senadeera, Suthep Wiyakrutta, Chulabhorn Mahidol, Somsak Ruchirawat, and Prasat Kittakooop

**NMR spectra of compounds 1-3.**

Fig. S1.  $^1\text{H}$  NMR spectrum ( $\text{CDCl}_3$ ) of compound **1**

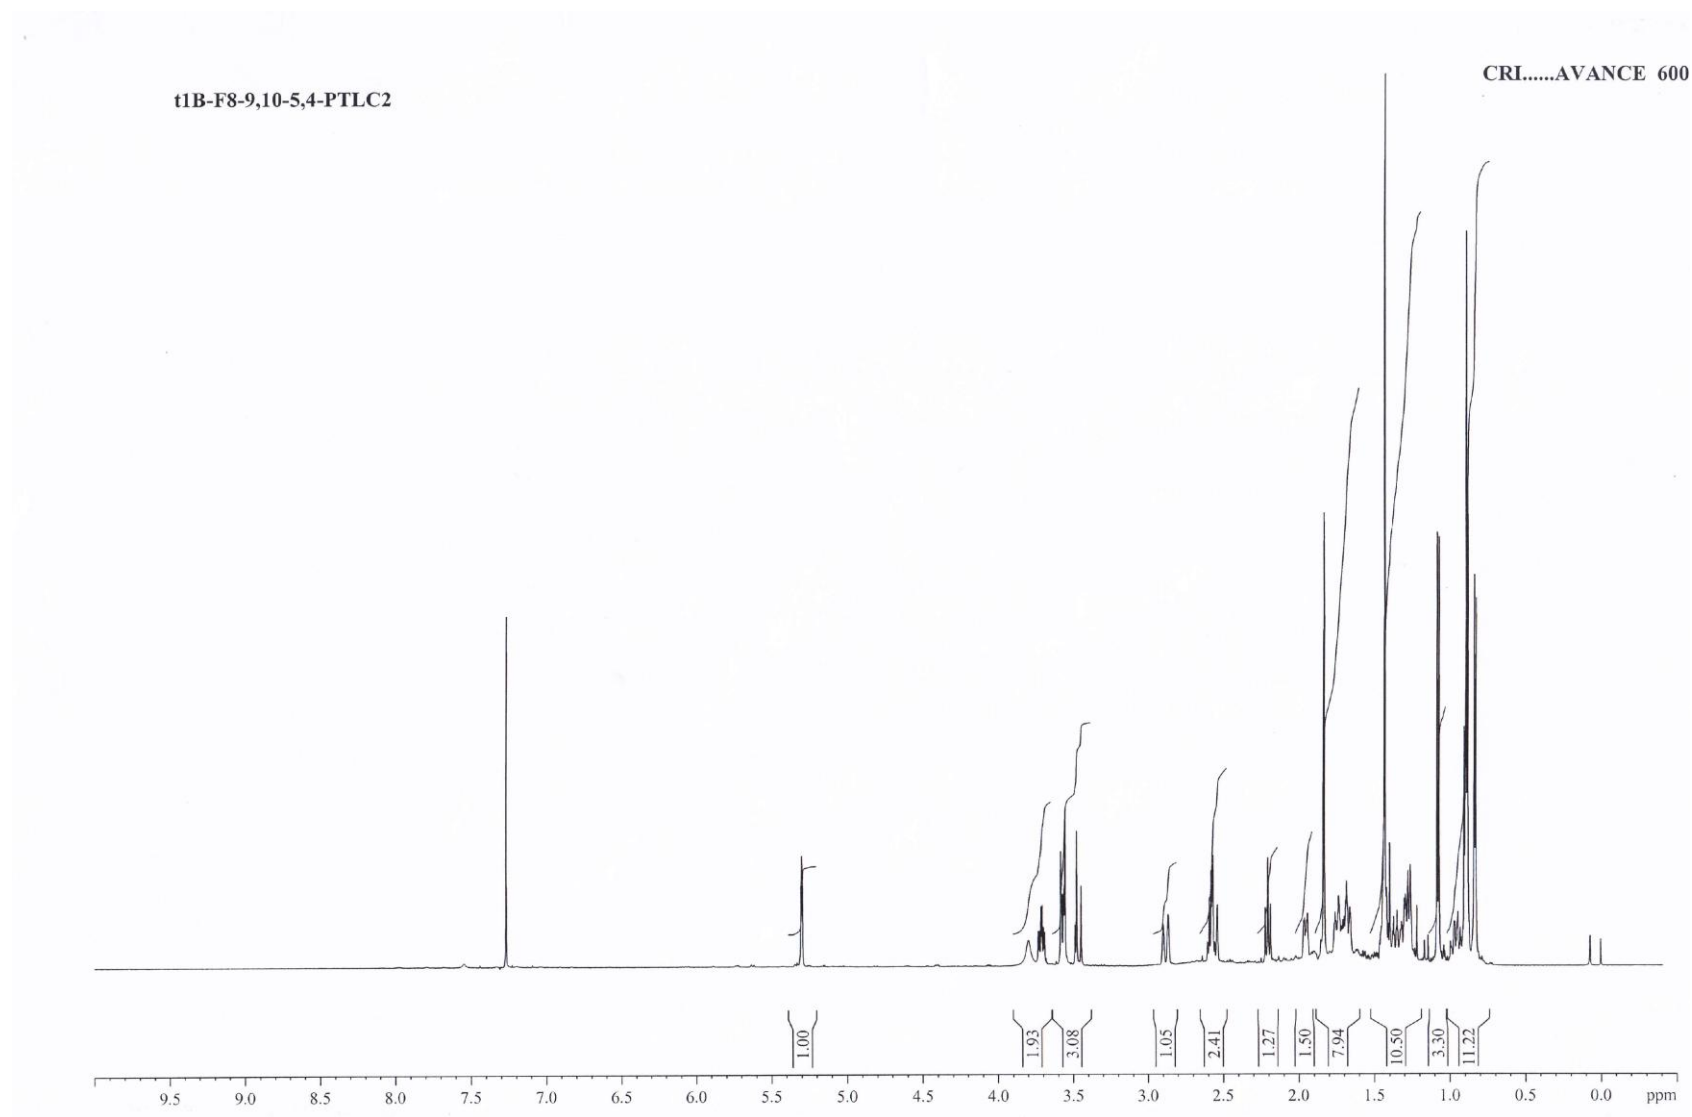

Fig. S2.  $^{13}\text{C}$  NMR spectrum ( $\text{CDCl}_3$ ) of compound **1**

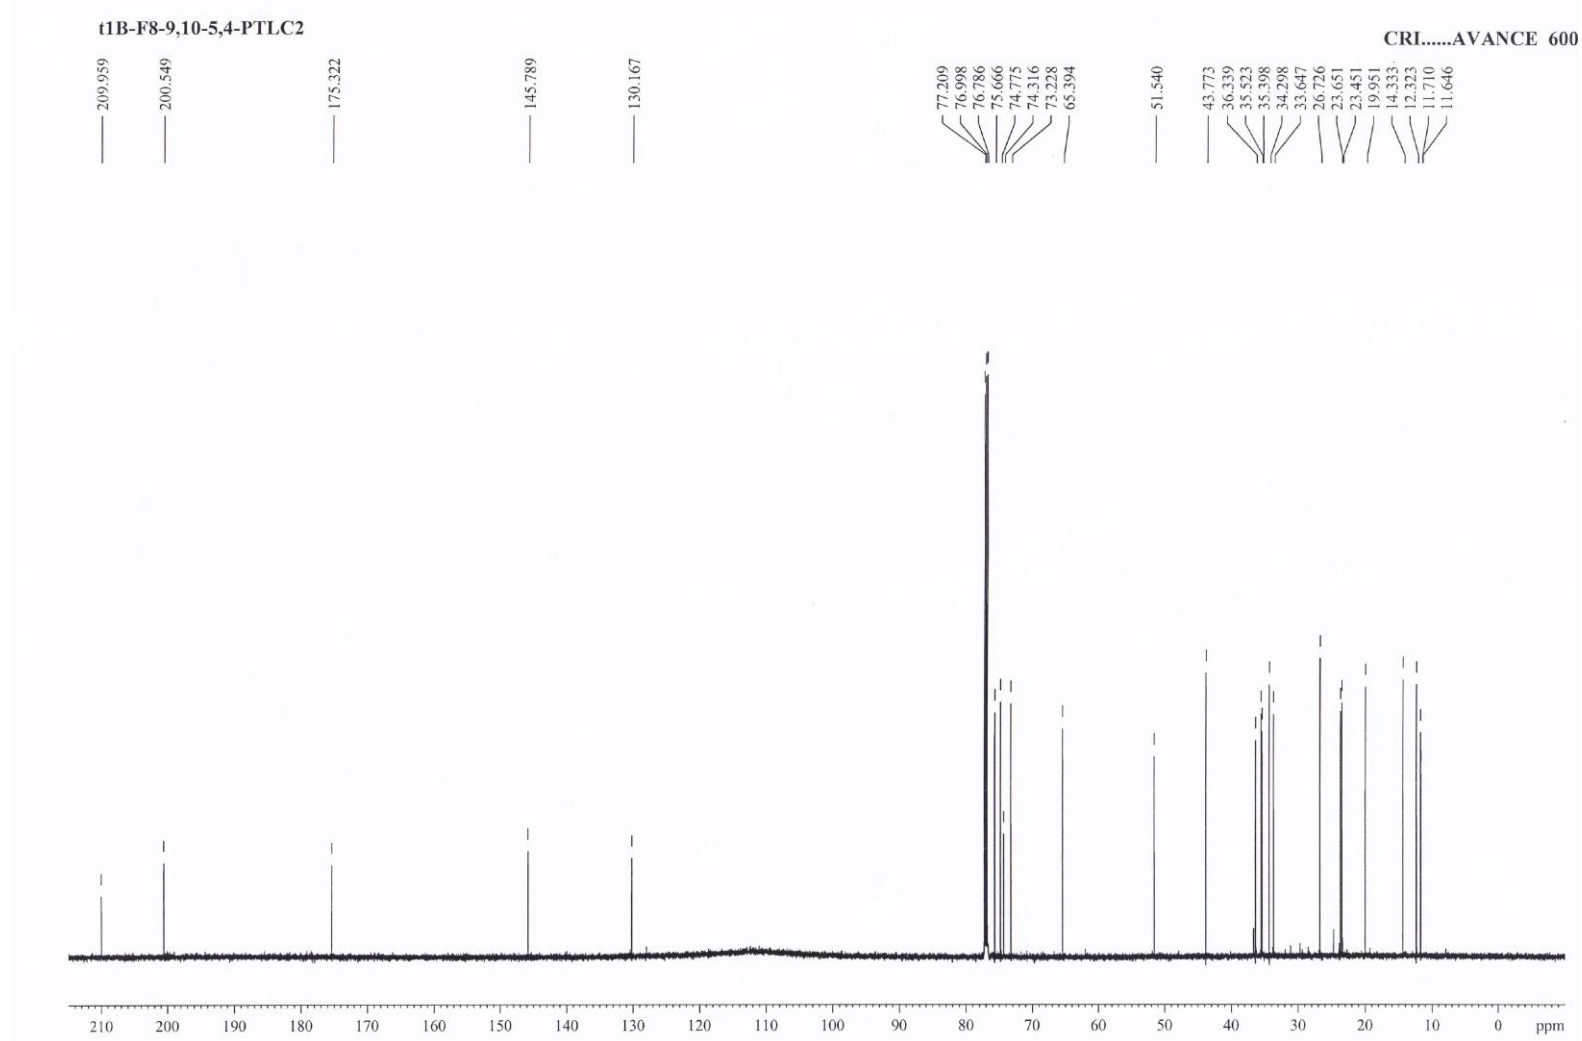

Fig. S3.  $^1\text{H}$ - $^1\text{H}$  COSY spectrum ( $\text{CDCl}_3$ ) of compound **1**

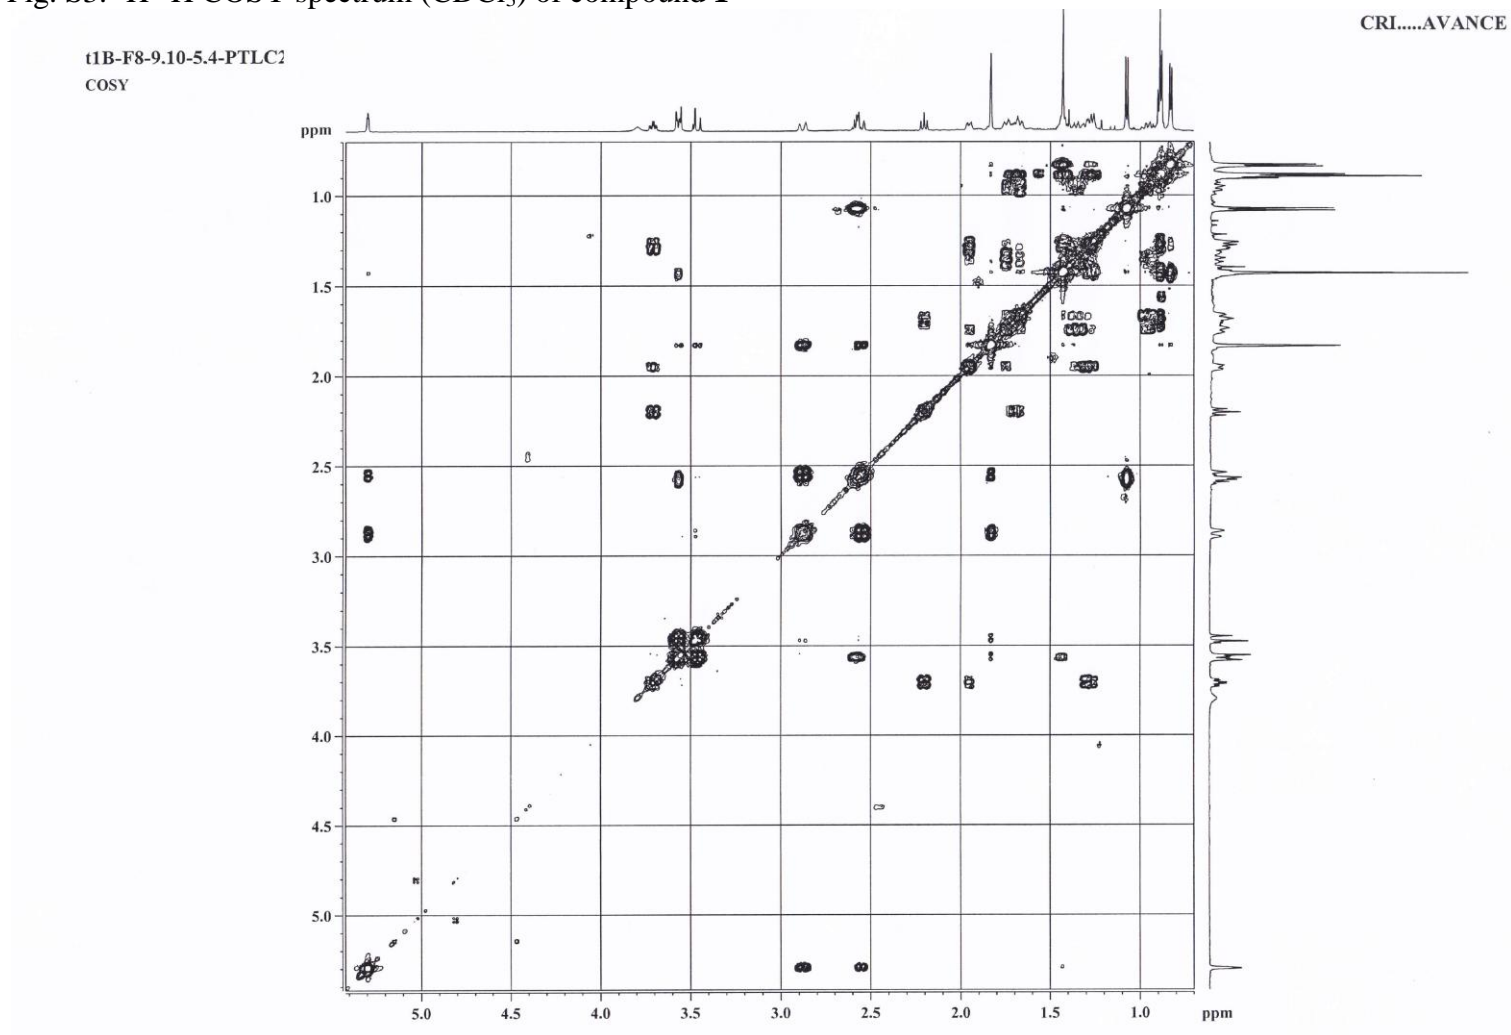

Fig. S4. HMQC spectrum ( $\text{CDCl}_3$ ) of compound **1**

t1B-F8-9.10-5.4-PTLC  
ed-HSQC

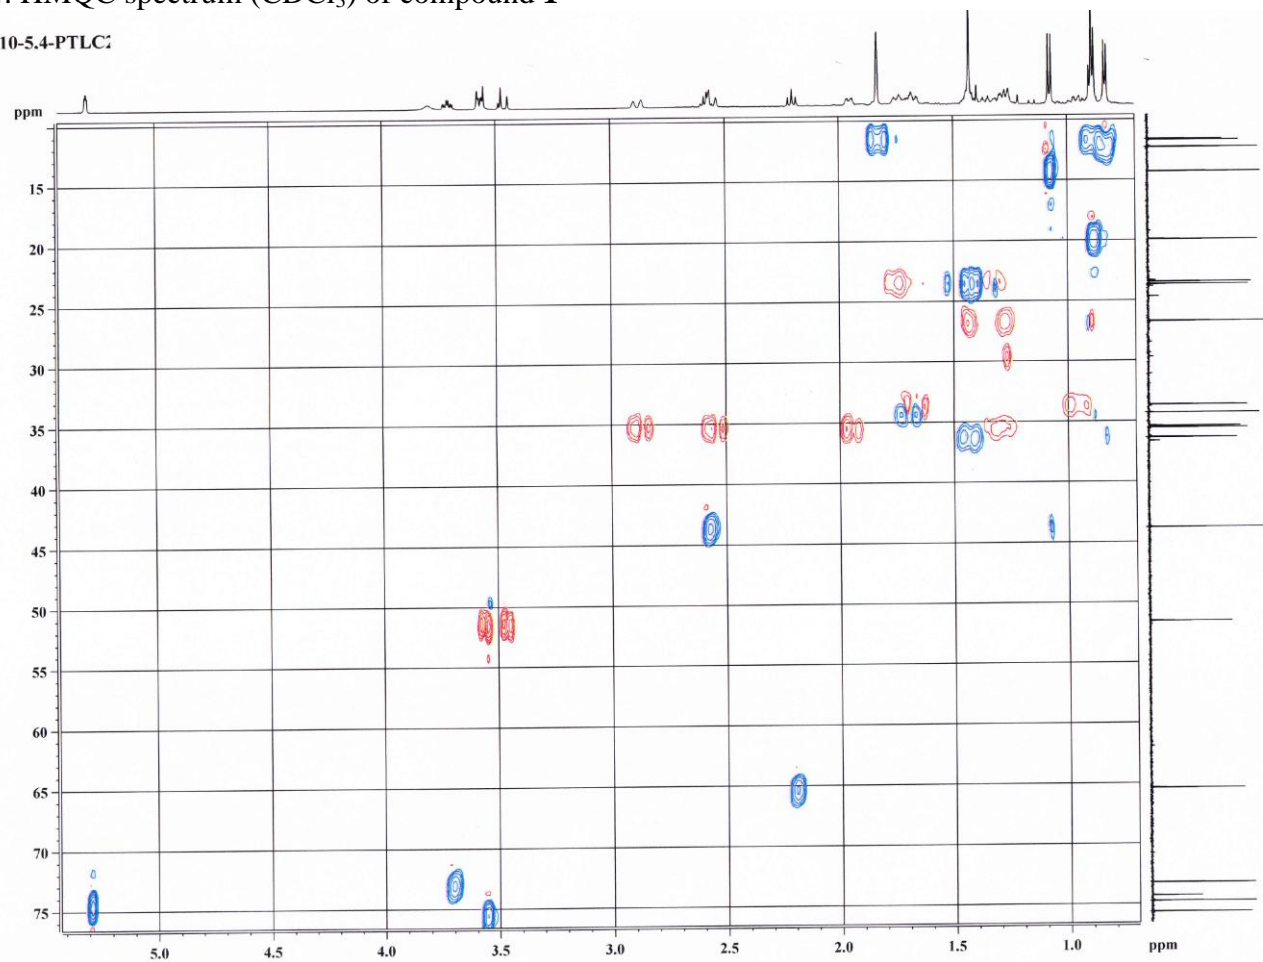

Fig. S5. HMBC spectrum (CDCl<sub>3</sub>) of compound **1**

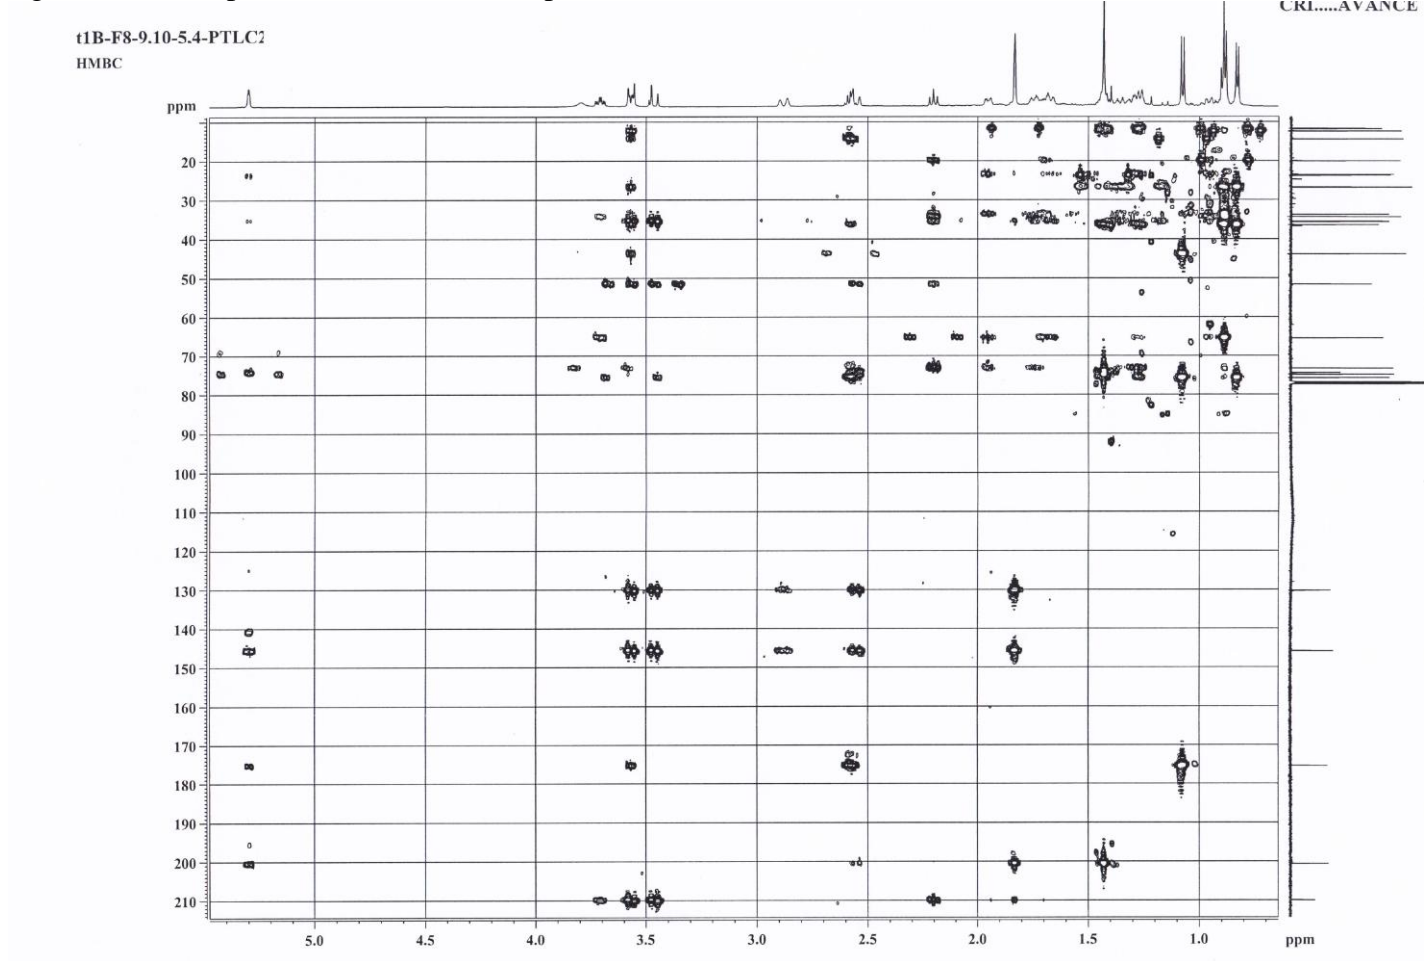

Fig. S6.  $^1\text{H}$  NMR spectrum ( $\text{CDCl}_3$ ) of compound **2**

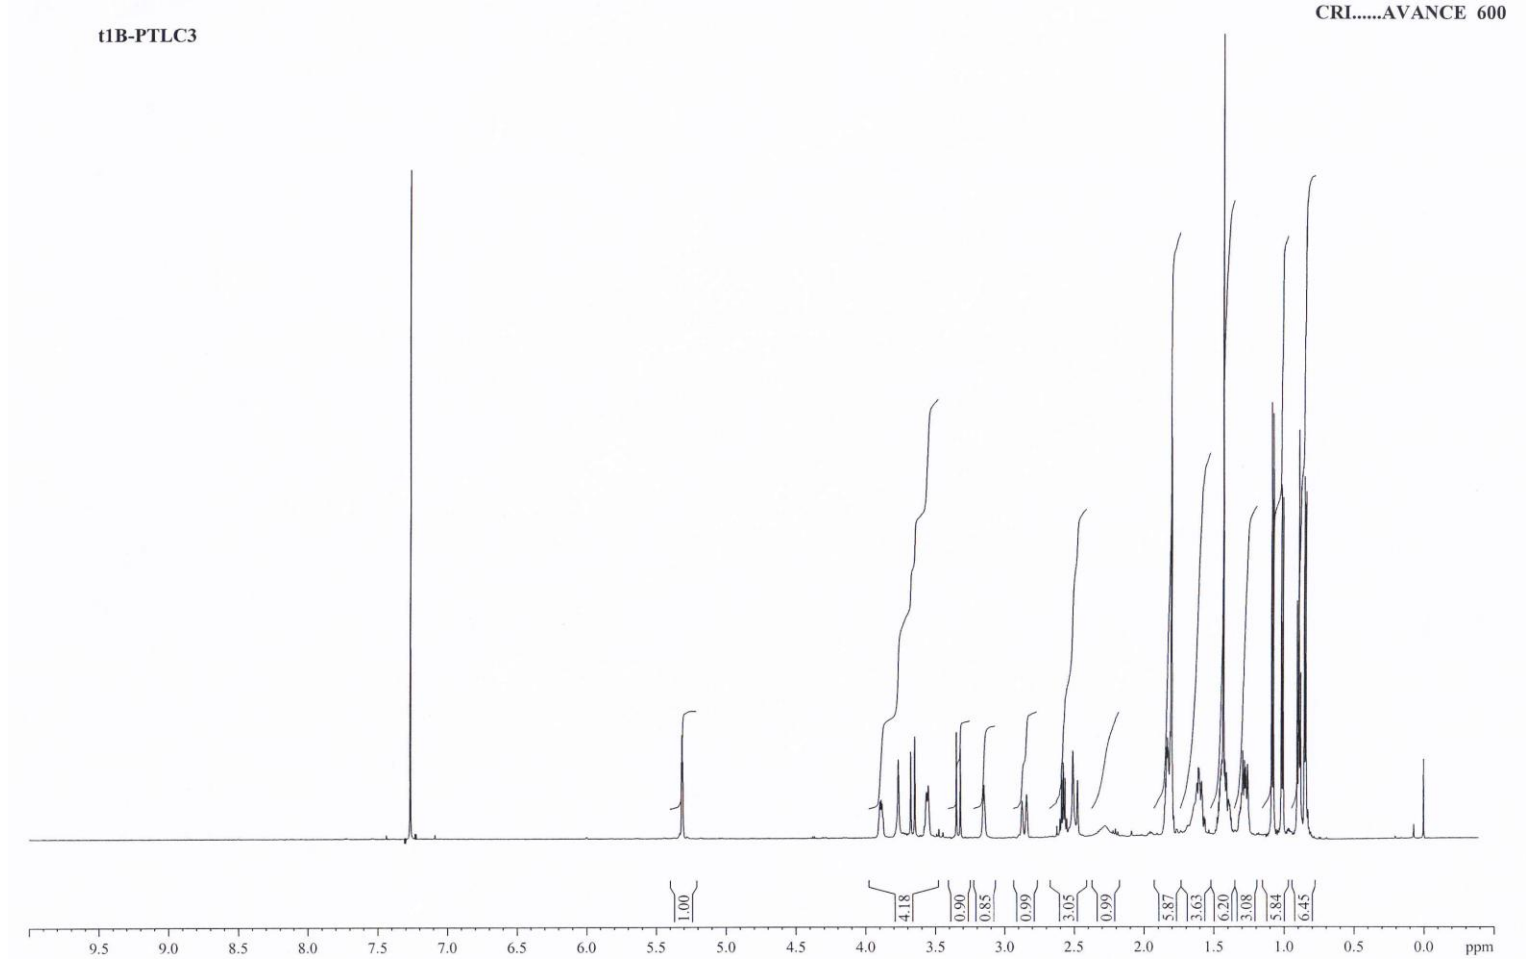

Fig. S7.  $^{13}\text{C}$  NMR spectrum ( $\text{CDCl}_3$ ) of compound **2**

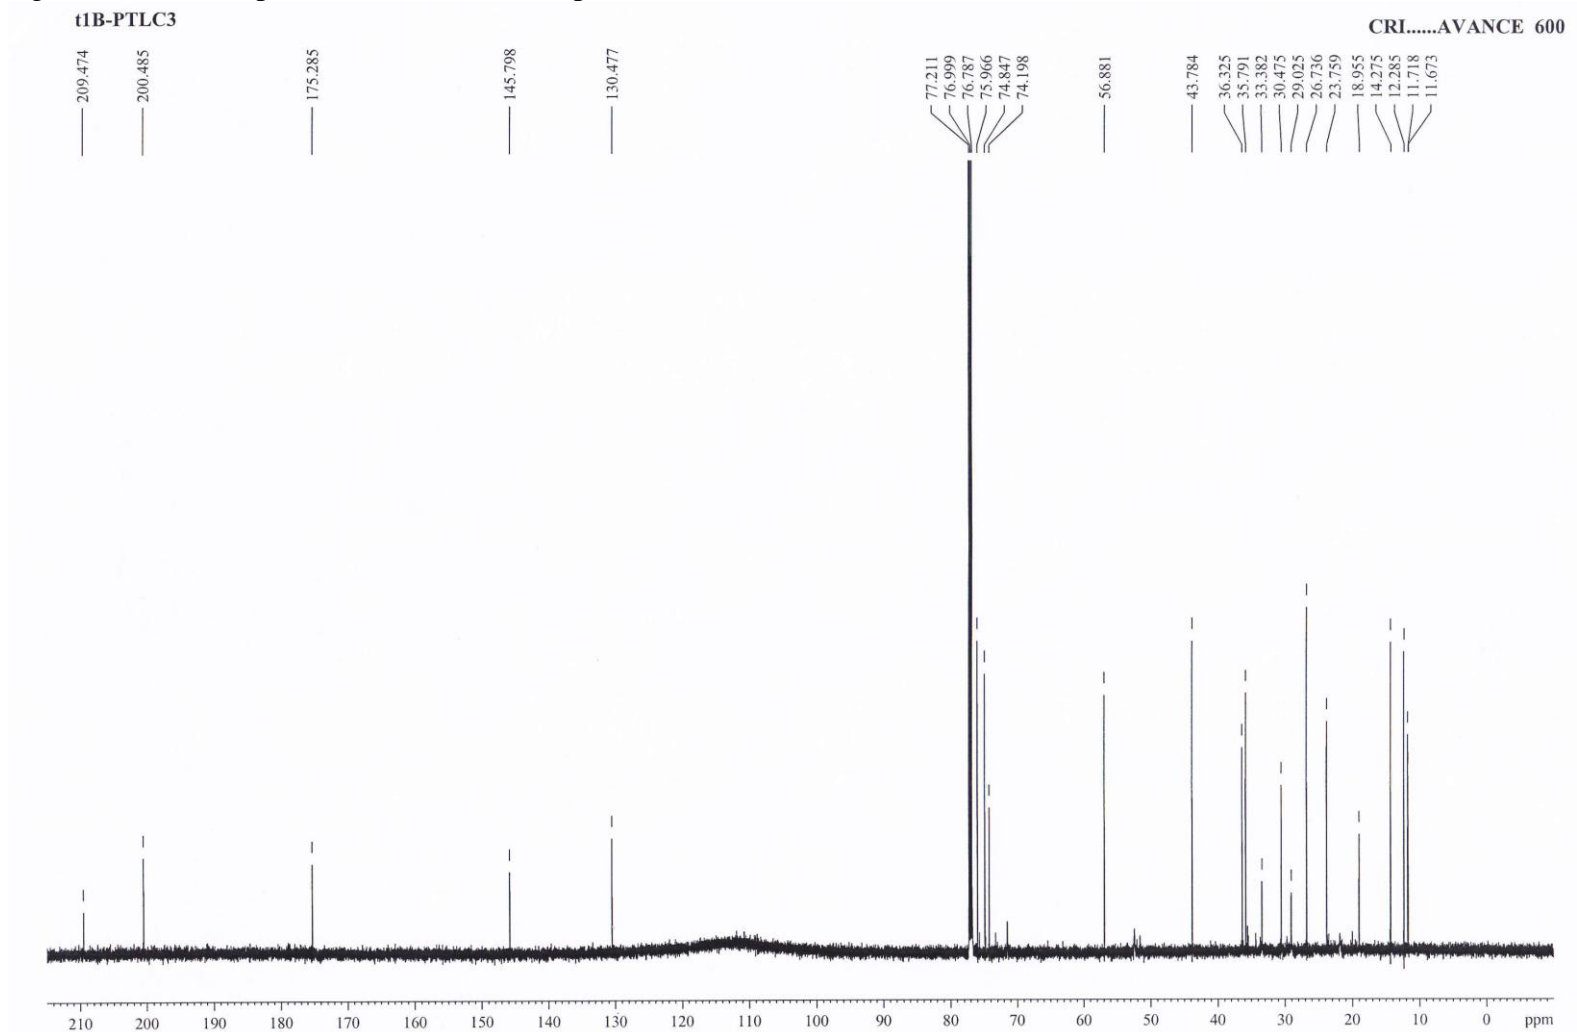



Fig. S8.  $^1\text{H}$ - $^1\text{H}$  COSY spectrum ( $\text{CDCl}_3$ ) of compound **2**

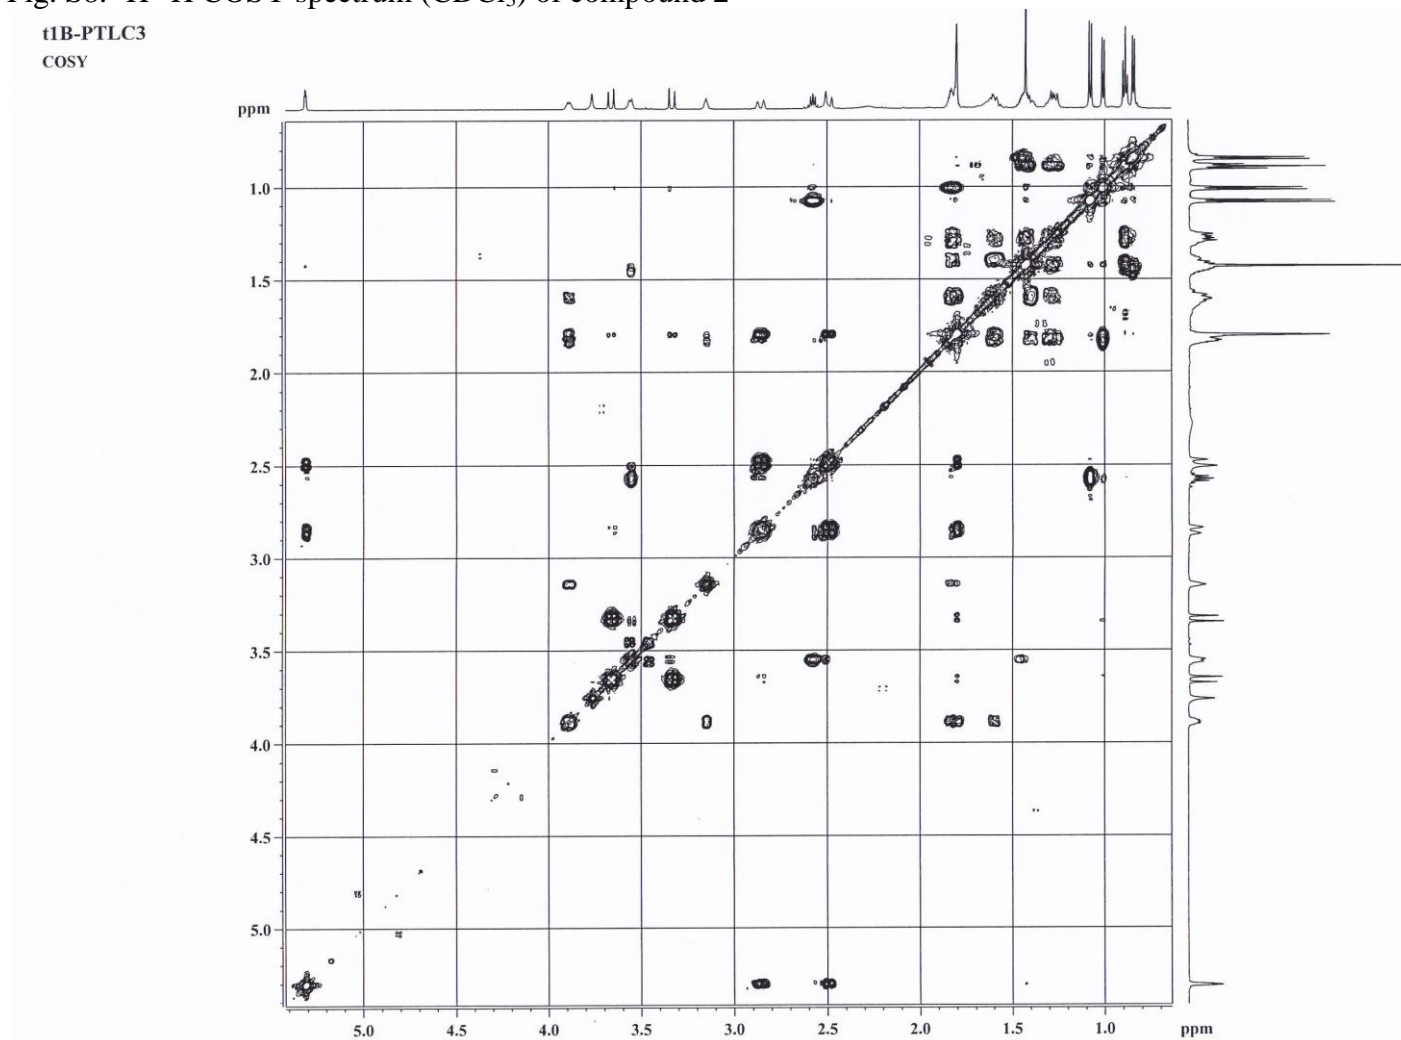

Fig. S9. HMQC spectrum (CDCl<sub>3</sub>) of compound **2**

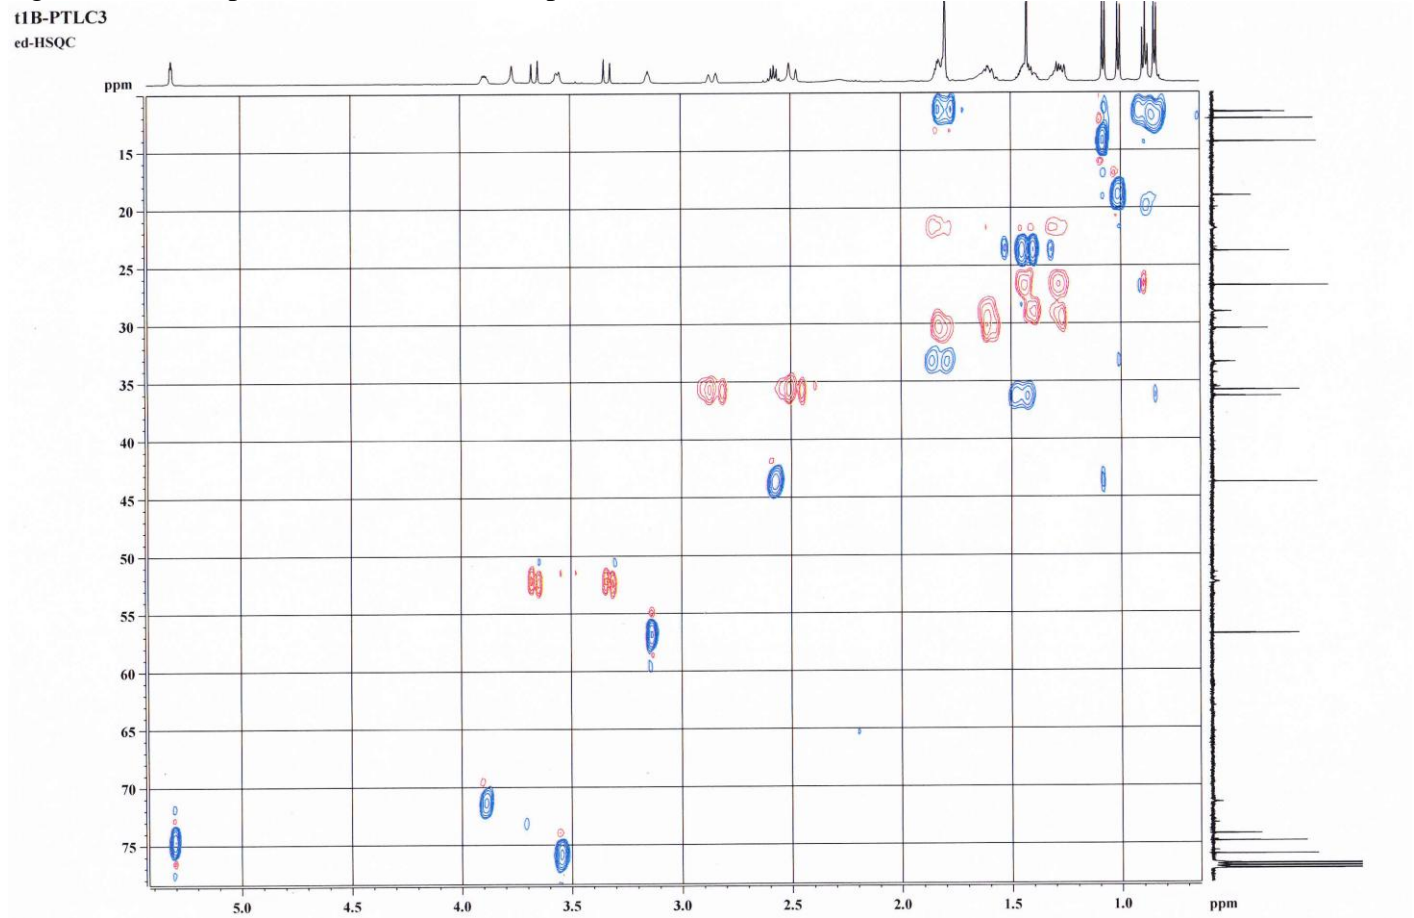

Fig. S10. HMBC spectrum (CDCl<sub>3</sub>) of compound 2

t1B-PTLC3  
HMBC

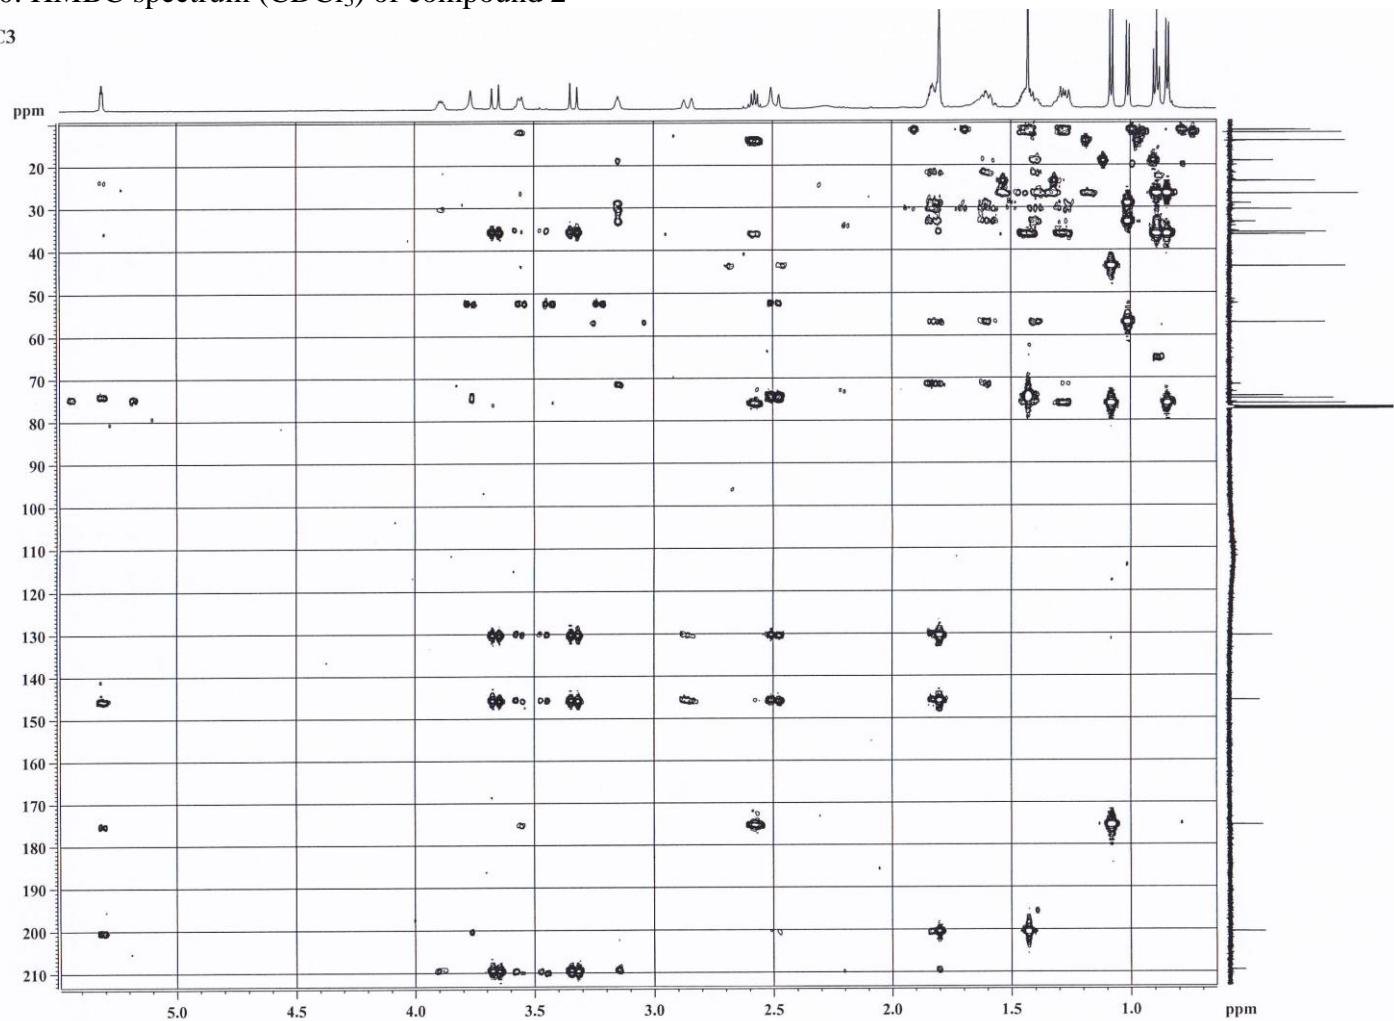

Fig. S11.  $^1\text{H}$  NMR spectrum ( $\text{CDCl}_3$ ) of compound **3**

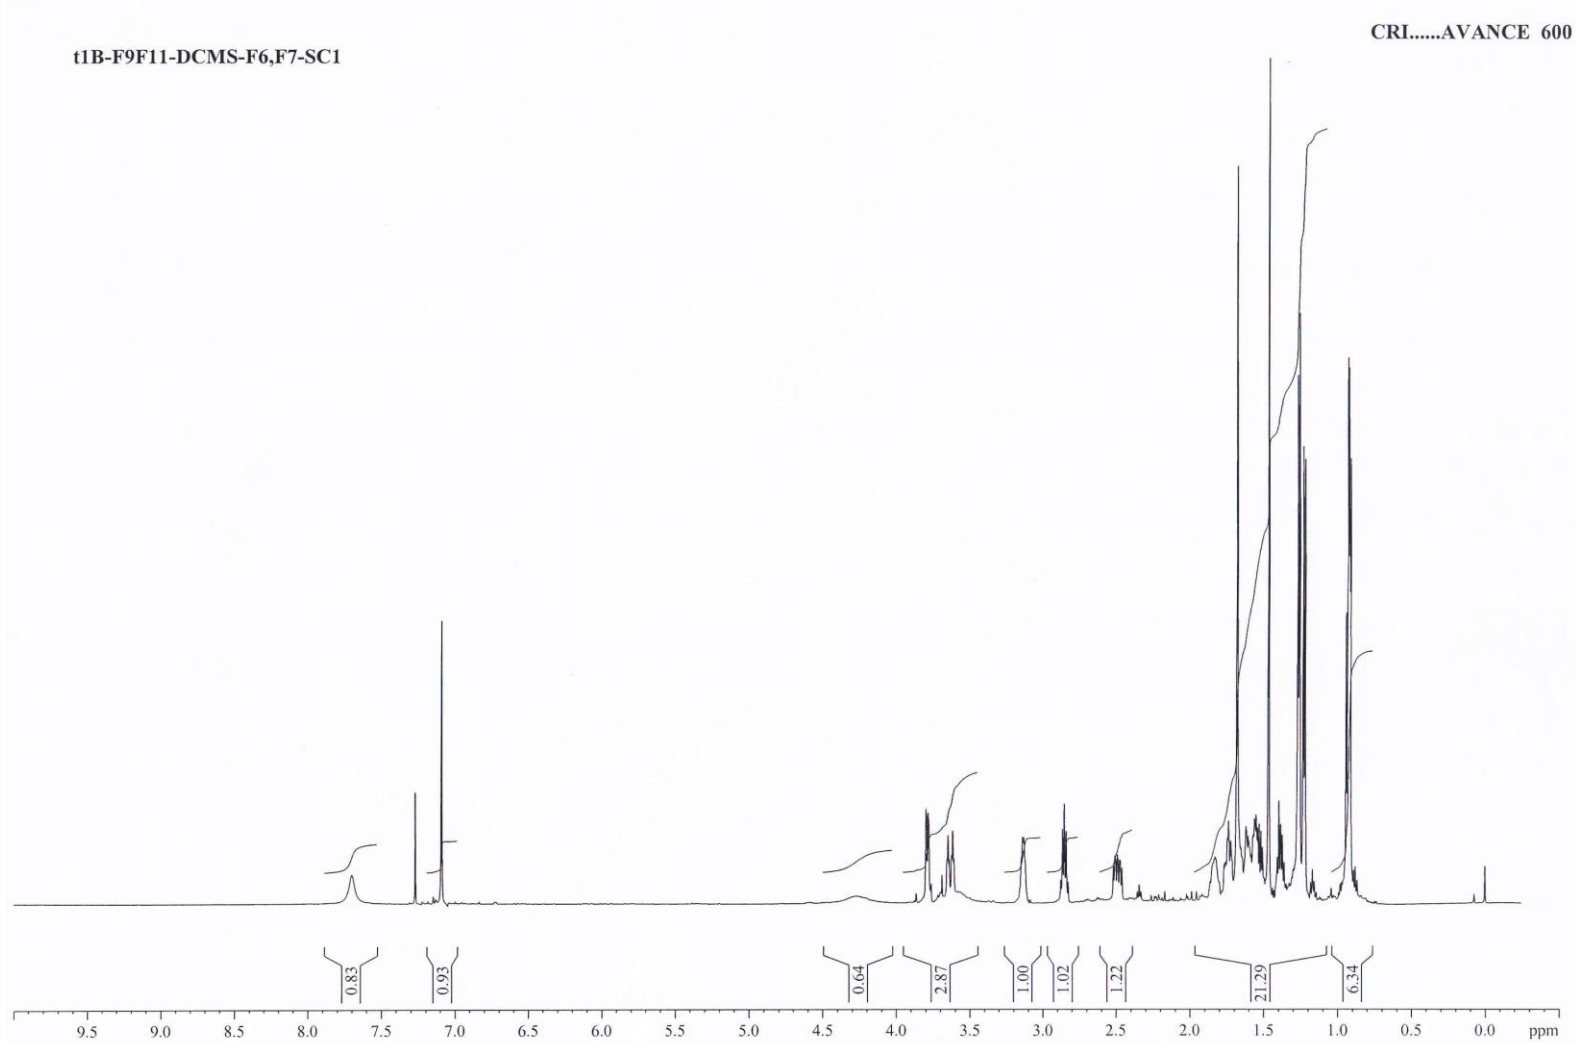

Fig. S12.  $^{13}\text{C}$  NMR spectrum ( $\text{CDCl}_3$ ) of compound **3**

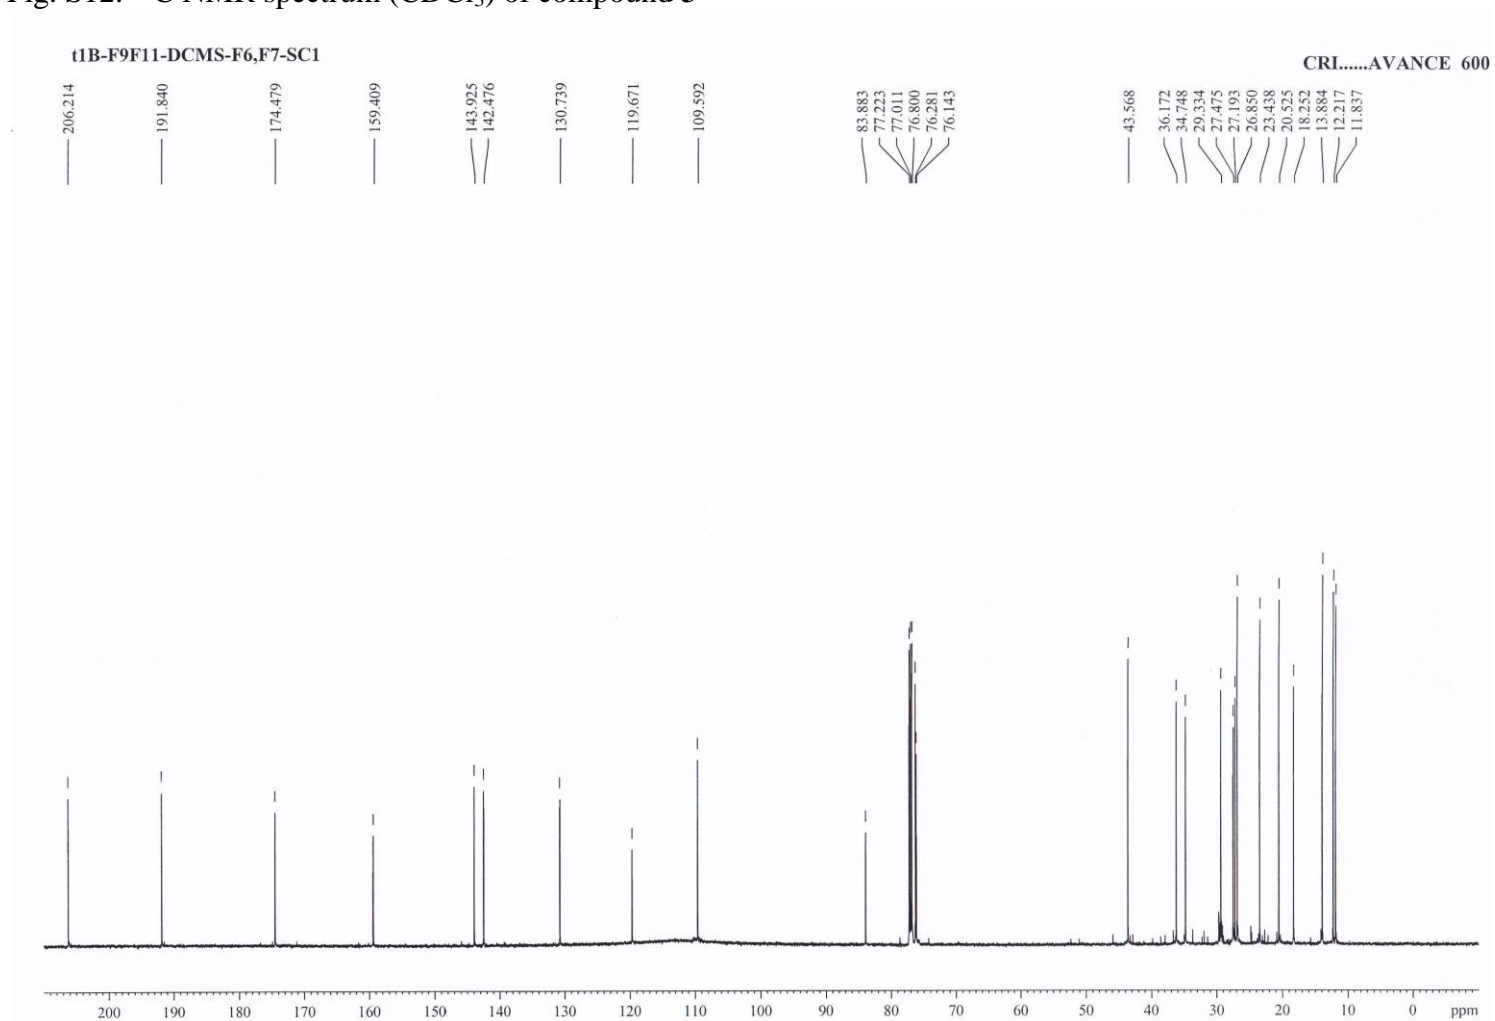

Fig. S13.  $^1\text{H}$ - $^1\text{H}$  COSY spectrum ( $\text{CDCl}_3$ ) of compound **3**

t1B-F9F11-DCMS-F6.F7-SC1  
COSY

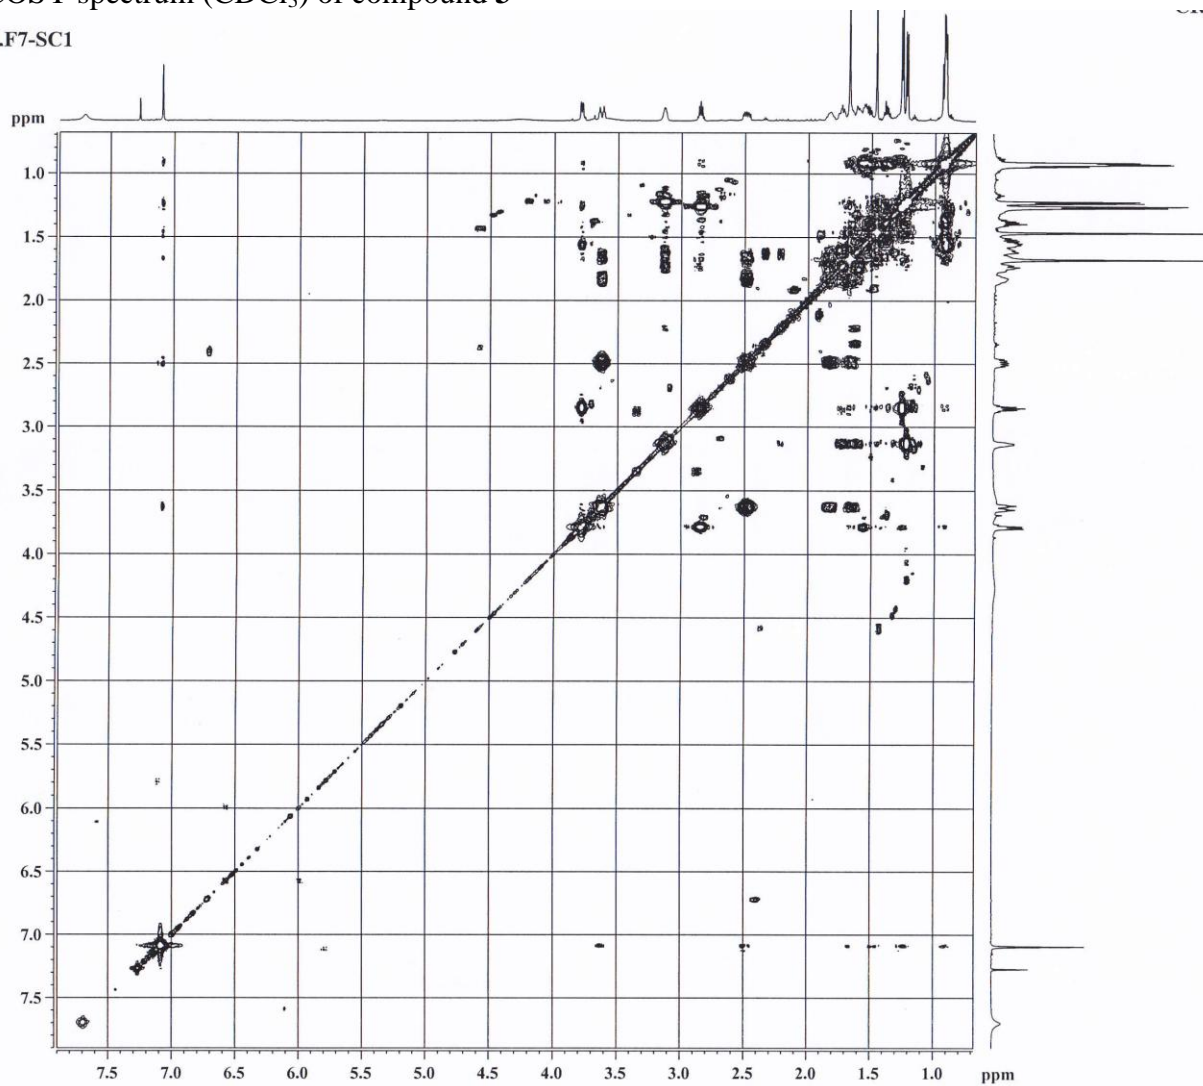

Fig. S14. HMQC spectrum (CDCl<sub>3</sub>) of compound **3**

t1B-F9F11-DCMS-F6.F7-SC1  
ed-HSQC

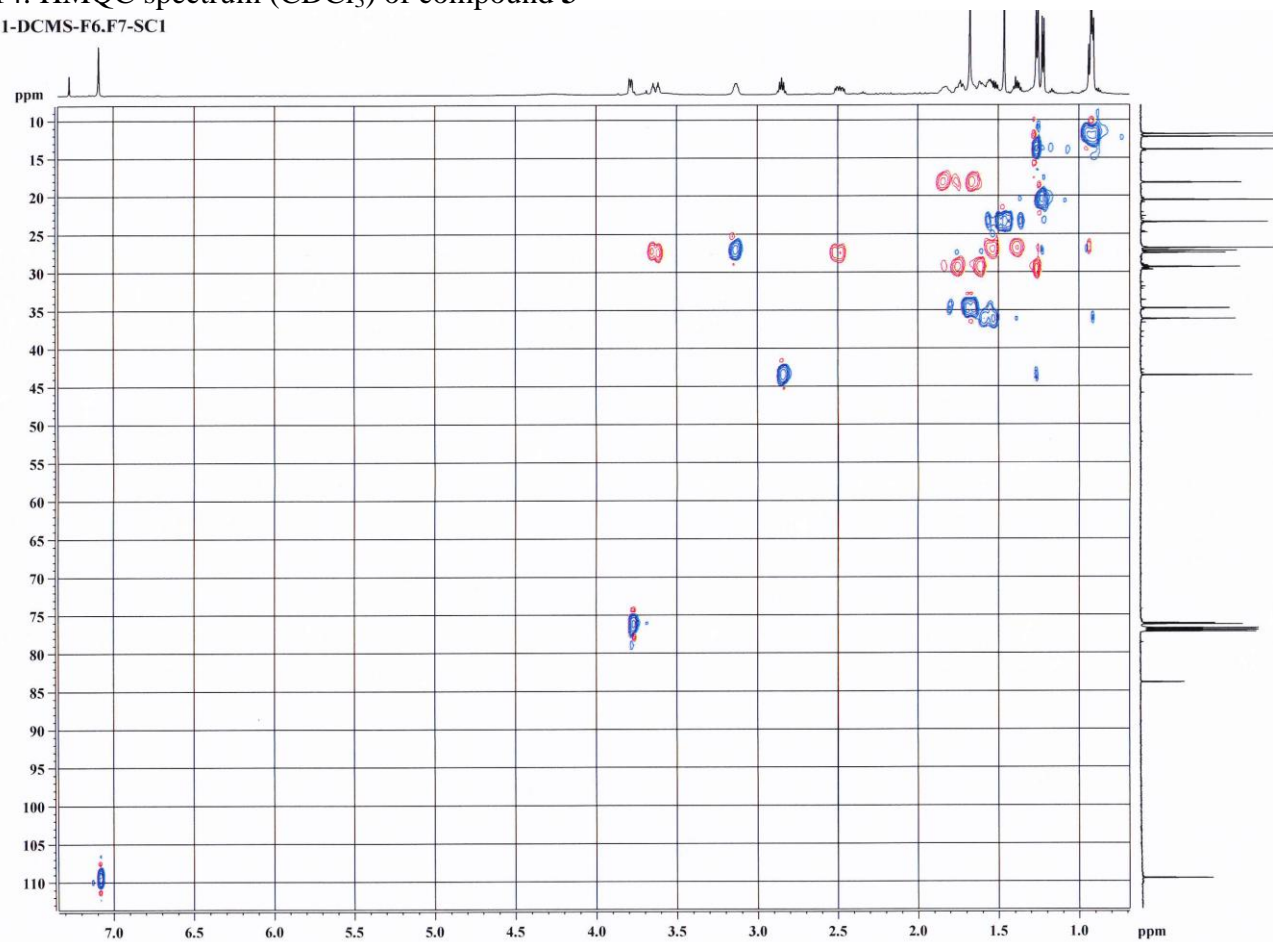



Fig. S15. HMBC spectrum (CDCl<sub>3</sub>) of compound **3**

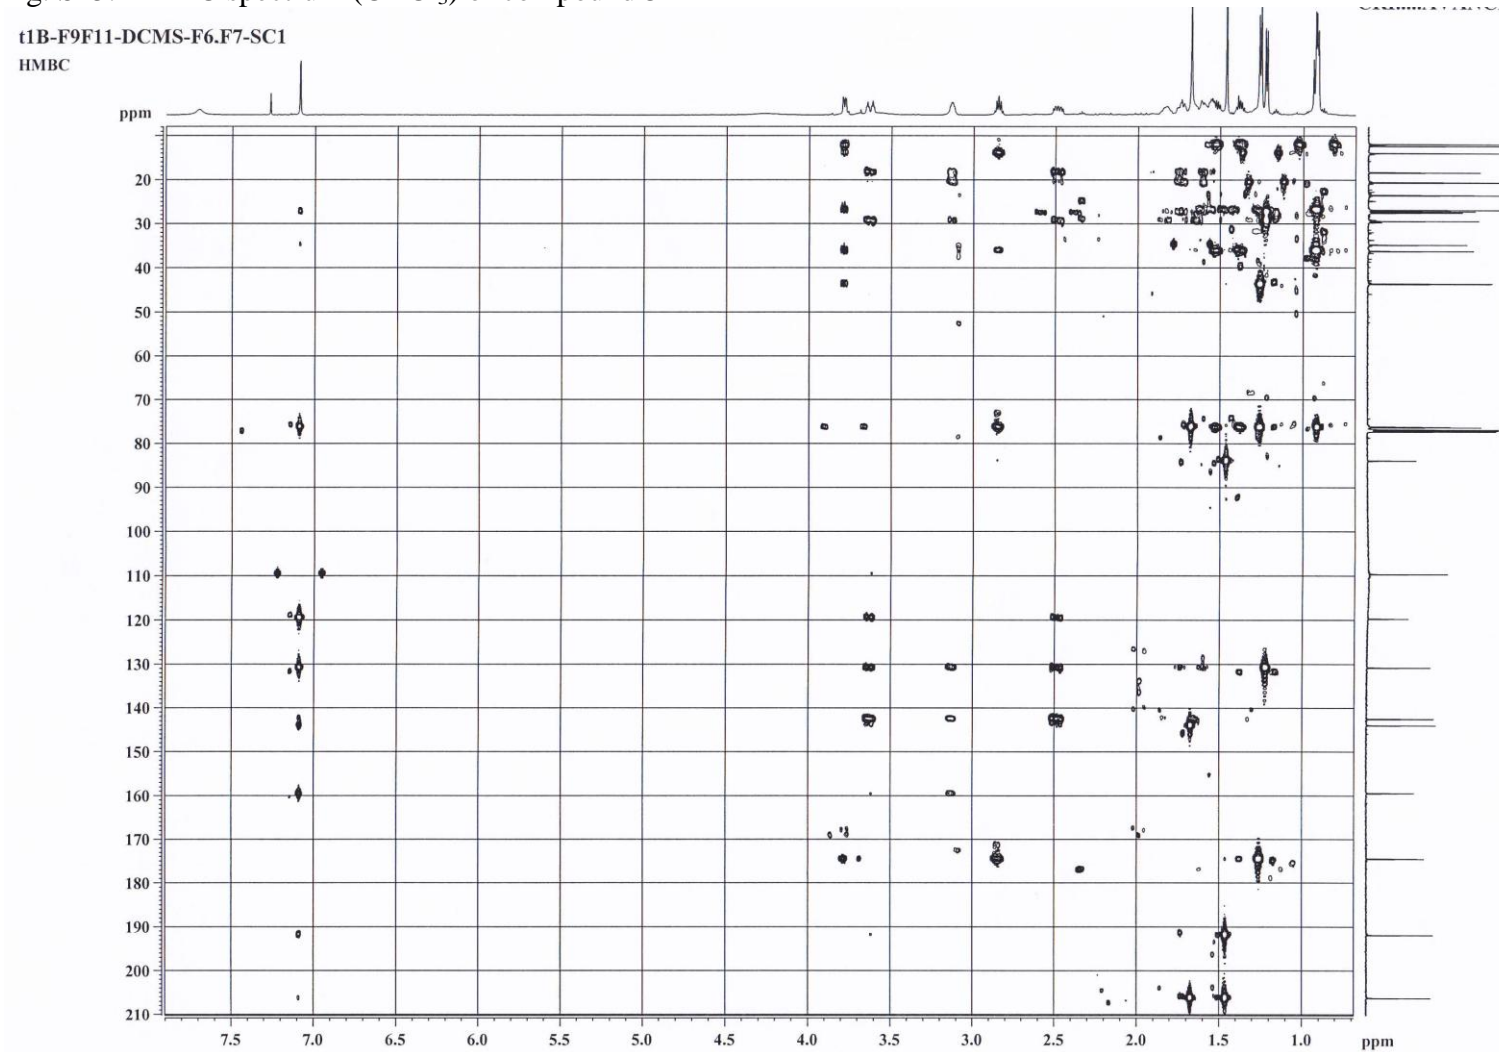

Supplement: c2ob25959a.pdf [file c2ob25959a.pdf]
